# Supplementary material for: Spatio-temporal variability of climatic variables and its impacts on rice yield in Bangladesh
Source: Frontiers journal article supplement (doi:10.3389/fsufs.2023.1290055), 2023-12-22
Supplement: Data_Sheet_1.docx [file Data_Sheet_1.docx]

**Supplementary files**


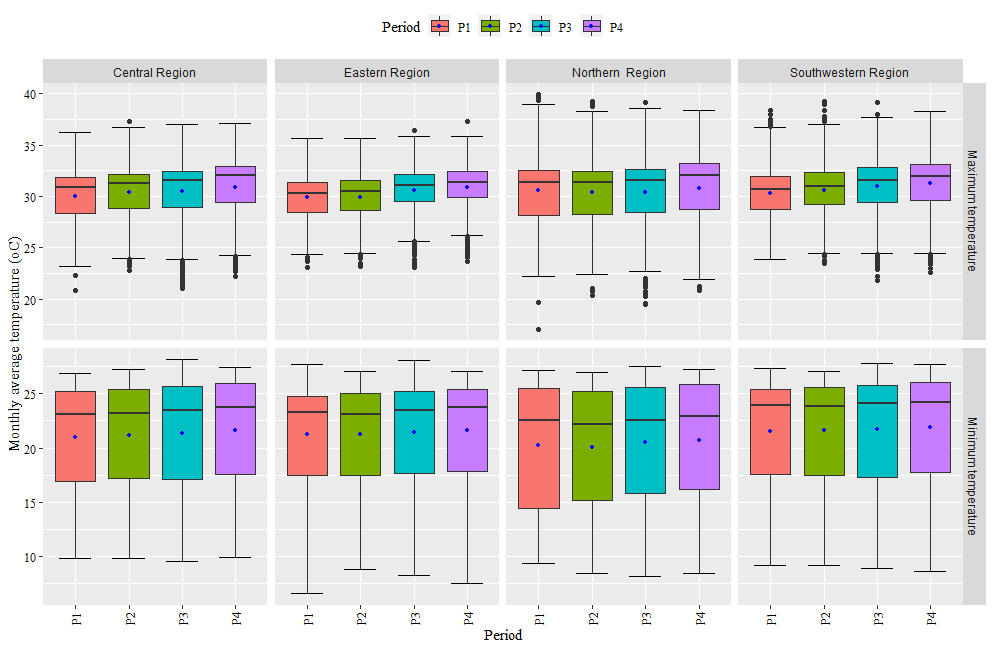


**Supplementary Figure S1.** Periodic distribution of monthly average minimum and maximum temperature in different regions of Bangladesh. Here P1 = 1970-1981, P2 = 1982-1993, P3 = 1994-2005, P4= 2006-2020


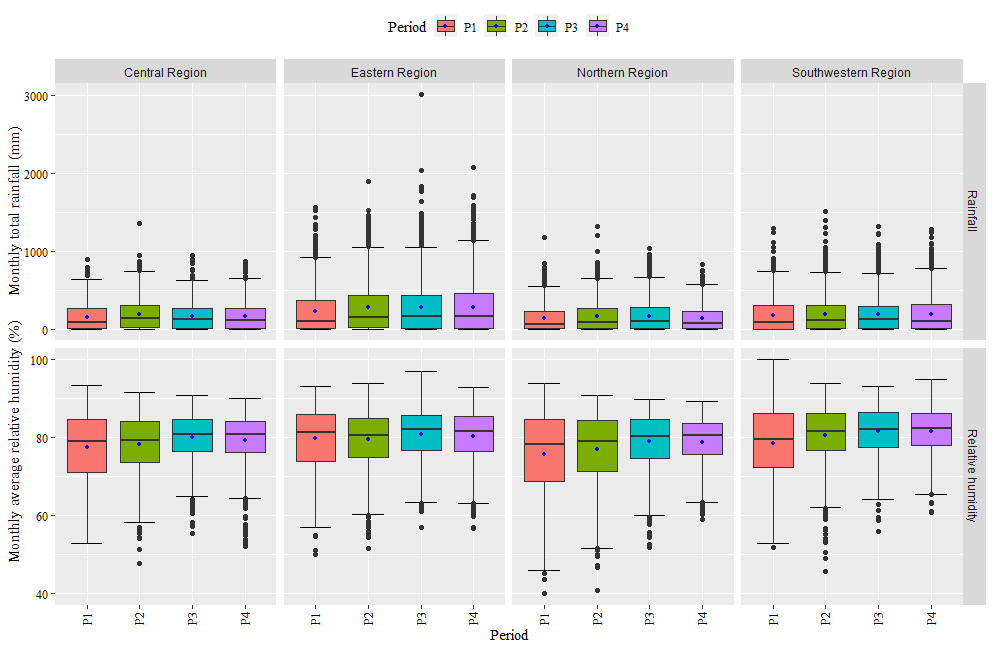


**Supplementary Figure S2.** Periodic distribution of monthly total rainfall and monthly average relative humidity in different regions of Bangladesh. Here, P= Period, P1 = 1970-1981, P2 = 1982-1993, P3 = 1994-2005, P4= 2006-2020
